# Supplementary material for: Accurate Estimation of Bicarbonate and Acetic Acid Concentrations with Wider Ranges in Anaerobic Media Using Classical FOS/TAC Titration Method
Source: MDPI journal article supplement (doi:10.3390/app112411843), 2021-12-13
Supplement: s1 [file s1]

# Accurate estimation of bicarbonate and acetic acid concentrations with wider ranges in anaerobic media using classical FOS/TAC titration method

Xiaojun Liu<sup>1</sup>, Laura André<sup>2</sup>, Maël Mercier-Huat<sup>1,2,3</sup>, Jean-Marie Grosmaître<sup>3</sup>, André Pauss<sup>1</sup> and Thierry Ribeiro<sup>2\*</sup>

<sup>1</sup> Université de technologie de Compiègne, ESCOM, TIMR (Integrated Transformations of Renewable Matter), Centre de recherches Royallieu, CS 60319, 60203 Compiègne CEDEX, France

<sup>2</sup> Institut Polytechnique UniLaSalle Beauvais, Département des Sciences et Techniques Agro-Industrielles, rue Pierre Waguët, BP 30313, 60026 Beauvais Cedex, France

<sup>3</sup> Cultimer France Producteurs Associés, 35120 Dol-de-Bretagne, France

## [SUPPLEMENTARY MATERIALS]

### List

**Table S1.**  $pK_a$  of main compounds in an anaerobic digester at 25°C (data extracted from Sun et al., 2016).

**Table S2.** TAC and FOS values reported in literature and calculated using Nordmann method versus the respective corrected values using new formulas (raw data collected from Jobling Purser et al., 2014).

**Figure S1.** Programming flowchart for the simulation of FOS/TAC titration curves.

**Scilab code 1** for calculation of the sodium bicarbonate contents at different acetic acid concentrations

**Scilab code 2** for calculation of the acetic acid contents at different sodium bicarbonate concentrations

*Table S1.  $pK_a$  of main compounds in an anaerobic digester at 25°C (data extracted from Sun et al., 2016 [18]).*

| Acid/Base couple           | Dissociation reaction                             | $pK_a$ (-) |
|----------------------------|---------------------------------------------------|------------|
| <i>Volatile fatty acid</i> |                                                   |            |
| Acetic acid                | $CH_3COOH \rightleftharpoons CH_3COO^- + H^+$     | 4.76       |
| Propionic acid             | $C_2H_5COOH \rightleftharpoons C_2H_5COO^- + H^+$ | 4.87       |
| Butyric acid               | $C_3H_7COOH \rightleftharpoons C_3H_7COO^- + H^+$ | 4.82       |
| Valeric acid               | $C_4H_9COOH \rightleftharpoons C_4H_9COO^- + H^+$ | 4.82       |
| <i>Alkalinity</i>          |                                                   |            |
| $H_2CO_3/HCO_3^-$          | $H_2CO_3 \rightleftharpoons HCO_3^- + H^+$        | 6.35       |
| $HCO_3^-/CO_3^{2-}$        | $HCO_3^- \rightleftharpoons CO_3^{2-} + H^+$      | 10.3       |

|                                                 |                                                                                 |      |
|-------------------------------------------------|---------------------------------------------------------------------------------|------|
| $\text{H}_3\text{PO}_4/\text{H}_2\text{PO}_4^-$ | $\text{H}_3\text{PO}_4 \rightleftharpoons \text{H}_2\text{PO}_4^- + \text{H}^+$ | 2.15 |
| $\text{H}_2\text{PO}_4^-/\text{HPO}_4^{2-}$     | $\text{H}_2\text{PO}_4^- \rightleftharpoons \text{HPO}_4^{2-} + \text{H}^+$     | 7.20 |
| $\text{HPO}_4^{2-}/\text{PO}_4^{3-}$            | $\text{HPO}_4^{2-} \rightleftharpoons \text{PO}_4^{3-} + \text{H}^+$            | 12.4 |
| $\text{NH}_4^+/\text{NH}_3$                     | $\text{NH}_4^+ \rightleftharpoons \text{NH}_3 + \text{H}^+$                     | 9.24 |

**Table S2.** TAC and FOS values reported in literature and calculated using Nordmann method versus the respective corrected values using new formulas (raw data collected from [16]).

| Sample                                  | TAC <sub>Nordmann</sub><br>(mg CaCO <sub>3</sub> ·L <sup>-1</sup> ) | FOS <sub>Nordmann</sub><br>(mg HAc·L <sup>-1</sup> ) | FOS/TAC <sub>Nordmann</sub><br>(-) | TAC <sub>new</sub><br>(mg CaCO <sub>3</sub> ·L <sup>-1</sup> ) | FOS <sub>new</sub><br>(mg HAc·L <sup>-1</sup> ) | FOS/TAC-<br>new<br>(-) |
|-----------------------------------------|---------------------------------------------------------------------|------------------------------------------------------|------------------------------------|----------------------------------------------------------------|-------------------------------------------------|------------------------|
| Energy<br>crop and<br>slurry<br>No. 121 | 10,800                                                              | 20,778                                               | 1.92                               | 4,277                                                          | 22,233                                          | 5.20                   |
| Food<br>waste No.<br>45                 | 18,252                                                              | 2,692                                                | 0.15                               | 18,778                                                         | 813                                             | 0.04                   |

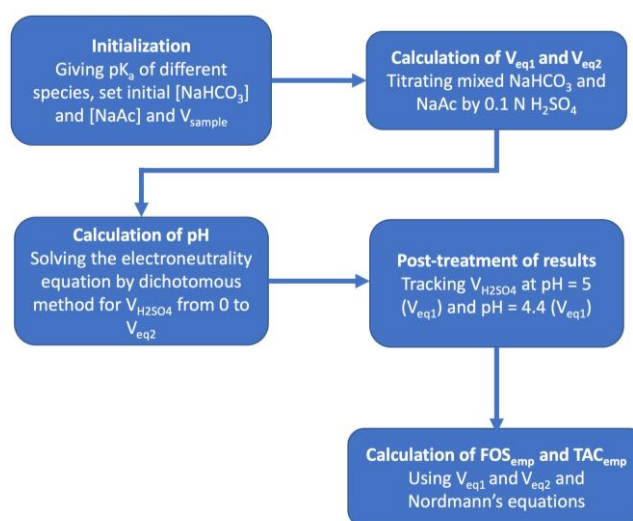

**Figure S1.** Programming flowchart for the simulation of FOS/TAC titration curves.

**Scilab code 1** for calculation of the sodium bicarbonate contents at different acetic acid concentrations

// titration\_FOS\_TAC\_Bicarbonate-simul\_vs\_Bicarbonate-theor.sce

## Manuscript submitted to Applied Sciences (MDPI)

*// English version made on 08 november 2021*

*// Accurate estimation of bicarbonate and acetic acid concentrations with wider ranges in anaerobic media using classical FOS/TAC titration method // Authors : X. Liu, M. Mercier-Huat, L. André, A. Pauss and T. Ribeiro // Université de Technologie de Compiègne (France) and Institut Polytechnique UniLaSalle (France)*

*// Simulation of NaHCO<sub>3</sub> contents by Nordmann's empirical formulas (FOS / TAC) and our newly proposed formulas for different theoretical NaHCO<sub>3</sub> contents at different HAc levels*

*// This work is licensed under a Creative Commons Attribution-NonCommercial 4.0 International License (CC BY-NC 4.0).*

*// ! IMPORTANT !*

*// To run the code, you must install fmincon from the Scilab command line (and restart Scilab): atomsInstall fmincon*

*// All mass concentrations are expressed in mg/L*

```
clear
funcprot(0)
clc

function [HAc, Ac, CO2, HCO3, CO3, zp]=HAc_bicarbonate(h)
    HAc=conc_HAc.*h./(h+Ka_HAc)
    Ac=conc_HAc*Ka_HAc./(h+Ka_HAc)
    deno_Ci=(h.*h)+(h.*Ka1_Ci)+(Ka1_Ci*Ka2_Ci)
    CO2=conc_Ci.*h.*h./deno_Ci
    HCO3=conc_Ci*Ka1_Ci.*h./deno_Ci
    CO3=conc_Ci*Ka1_Ci*Ka2_Ci./deno_Ci
    zp=(h+conc_Na)-((1e-14./h)+Ac+HCO3+2.*CO3+2*conc_H2SO4)
endfunction

HAc_data=[0 50 100 500 1000 3000 5000 7000 10000 15000 20000 40000] //mg/L
Bicarbonate_data=[0 50 100 500 1000 3000 5000 7000 10000 15000 20000 40000] //mg/L
N_data=length(Bicarbonate_data)
Ka1_Ci=10^(-6.35);Ka2_Ci=10^(-10.35)
Ka_HAc=10^(-4.76)
pH_init=8

//// Conditions of titration
txt=['Sample volume (mL)';'Water volume for dilution (mL)';'Concentration of the titrant - H2SO4 (mol/L)';'First pH equivalence point (-)';'Second pH equivalence point (-)';'Number of steps of titration (min 5000)'];
sig=x_mdialog('Enter the values, or accept the default values (!! use the point as decimal separator !!)',txt,['5';'15';'0.05';'5';'4.4';'7000'])
volume_sample=evstr(sig(1))
volume_water_dilution=evstr(sig(2))
conc_init_H2SO4=evstr(sig(3))
high_endpoint=evstr(sig(4))
low_endpoint=evstr(sig(5))
N=evstr(sig(6))

for kk=1:length(HAc_data)
    for j=1:N_data
        conc_mass_init_Ci=Bicarbonate_data(j) // mg/L
        conc_mass_init_HAc=HAc_data(kk) // mg/L

        // convert mg/L to mol/L
        conc_init_Ci=conc_mass_init_Ci/84/1000 // mol/L
        conc_init_HAc=conc_mass_init_HAc/60/1000 // mol/L
        conc_init_Na=conc_init_Ci+conc_init_HAc

        Veq = (conc_init_Ci+conc_init_HAc)*volume_sample/2/conc_init_H2SO4
        if HAc_data(kk)<=50;Veq=Veq*2;end // extention of titration in the absence of HAc
        if Veq==0 // avoid Veq=0 for [HAc]=0 and [Bicarbonate]=0
```

## Manuscript submitted to Applied Sciences (MDPI)

```
    Veq=10^(-3)*volume_sample/2/conc_init_H2SO4 // titration until pH=3
end

/// calculation of concentration with dilution factors
volume_H2SO4=linspace(0,Veq,N)
dilution_factor=volume_sample./(volume_sample+volume_H2SO4+volume_water_dilution)
conc_Ci=conc_init_Ci.*dilution_factor
conc_HAc=conc_init_HAc.*dilution_factor
conc_Na=conc_init_Na.*dilution_factor
conc_H2SO4=conc_init_H2SO4.*volume_H2SO4./(volume_sample+volume_H2SO4+volume_water_dilution)

/// calculation of pH during the titration by a dichotomous method
pH=pH_init*ones(1,N)
for z=1:20
    [HAc,Ac,CO2,HCO3,CO3,zp]=HAc_bicarbonate(10^(-pH))
    pH=pH+sign(zp)*14*0.5^z
end

// identification of the equivalent volumes corresponding to the 2 reference pH points of the titration
for ii=1:N
    while pH(ii)>high_endpoint
        ii=ii+1
    end
    Veq1=(volume_H2SO4(ii)+volume_H2SO4(ii-1))/2
    pH_Veq1=(pH(ii)+pH(ii-1))/2
    while pH(ii)>low_endpoint
        ii=ii+1
    end
    Veq2=(volume_H2SO4(ii)+volume_H2SO4(ii-1))/2
    pH_Veq2=(pH(ii)+pH(ii-1))/2
    break
end

// Calculation of [HAc] et [bicarbonate] for HACH titrateur using Nordmann method (note that the sample volume must be 5 mL)
TAC_old(j,kk)=Veq1*50045*2*conc_init_H2SO4/volume_sample
Bicarbonate_old(j,kk)=84/100* TAC_old(j,kk)*2
HAc_old(j,kk)=(((Veq2-Veq1)*4*1.66)-0.15)*500 // 1.66 et 0.15 are purely empirical factors given by McGhee (1968)

Veq1_titration(j,kk)=Veq1 // to export the results
DeltaV_titration(j,kk)=Veq2-Veq1
end
end

// identification of model parameters
function y=f(x, V)
    y=x(1)*V(1)+x(2)*V(2)+x(3) // Model: [NaHCO3]new = Bicarbonate_new_a * Veq1 + Bicarbonate_new_b * (Veq2-Veq1) in mg/L
endfunction

function SSE=regres_f(x, V, y_theo)
    e=f(x,V)-y_theo
    SSE=sum(e.^2)
endfunction

opt = optimoptions('fmincon'); // fmincon optimization method
V=list(Veq1_titration,DeltaV_titration)
Bicarbonate_theo=zeros(length(Bicarbonate_data),length(HAc_data))

for i=1:length(Bicarbonate_data)
    Bicarbonate_theo(i,:)=Bicarbonate_data(i)
```

```

end
Bicarbonate_new_a0=1000 // initial values for regression
Bicarbonate_new_b0=-1000
Bicarbonate_new_c0=0
x0_f=[Bicarbonate_new_a0 Bicarbonate_new_b0 Bicarbonate_new_c0]

problem_f = struct();
problem_f.objective = list(regres_f,V,Bicarbonate_theo);
problem_f.x0 = x0_f;
problem_f.options = opt;
thetaopt_f = fmincon(problem_f);
Bicarbonate_new_a=thetaopt_f(1)
Bicarbonate_new_b=thetaopt_f(2)
Bicarbonate_new_c=thetaopt_f(3)
SSE=regres_f(thetaopt_f,V,Bicarbonate_theo)
e_tot=Bicarbonate_theo-mean(Bicarbonate_theo)
SST=sum(e_tot.^2)
R2=1-SSE/SST

// show modeling results
format(7)
disp('pH1 = '+string(high_endpoint)+' pH2 = '+string(low_endpoint))
disp('Bicarbonate_new_a = '+string(thetaopt_f(1))+' Bicarbonate_new_b = '+string(thetaopt_f(2))+' Bicarbonate_new_c = '+string(thetaopt_f(3)))
disp('[NaHCO3] = '+string(thetaopt_f(1))+' * A '+string(thetaopt_f(2))+' * B + '+ string(thetaopt_f(3)) +' ([NaHCO3] in mg/L)')
disp('with A = Veq1 and B = Veq2 - Veq1 (A and B in mL)')
disp('R2 = '+string(R2))

Bicarbonate_old_to_new_a=Bicarbonate_new_a./1000.9
Bicarbonate_old_to_new_b=Bicarbonate_new_b./3320
Bicarbonate_old_to_new_c=75*Bicarbonate_new_b./3320+Bicarbonate_new_c
disp('[NaHCO3] old to new = '+string(Bicarbonate_old_to_new_a)+' * TAC old '+string(Bicarbonate_old_to_new_b)+' * FOS old '+string(Bicarbonate_old_to_new_c)+' ([NaHCO3] in mg/L)')
disp('TAC old to new = '+string(0.595*Bicarbonate_old_to_new_a)+' * TAC old '+string(0.595*Bicarbonate_old_to_new_b)+' * FOS old '+string(0.595*Bicarbonate_old_to_new_c)+' (TAC in mg/L)')

// Calculate relative errors and Mean Absolute Percentage Error (MAPE)
sum_relative_errors_new=0 // initial values to calculate the relative errors
sum_relative_errors_old=0
sum_relative_errors_corr=0

relative_error_new(1,:)=0 // We do not calculate the relative errors for [bicarbonate] = 0
relative_error_old(1,:)=0
relative_error_corr(1,:)=0

for kk=1:length(HAc_data)
    for j=1:N_data
        Bicarbonate_new(j,kk)=(Veq1_titration(j,kk)*Bicarbonate_new_a)+(DeltaV_titration(j,kk)*Bicarbonate_new_b)+Bicarbonate_new_c
        Bicarbonate_old_to_new(j,kk)=(TAC_old(j,kk)*Bicarbonate_old_to_new_a)+(HAc_old(j,kk)*Bicarbonate_old_to_new_b)+Bicarbonate_old_to_new_c

        e_new(j,kk)=Bicarbonate_new(j,kk)-Bicarbonate_data(j)
        e_old(j,kk)=Bicarbonate_old(j,kk)-Bicarbonate_data(j)
        e_corr(j,kk)=Bicarbonate_old_to_new(j,kk)-Bicarbonate_data(j)

        if Bicarbonate_data(j)>0
            relative_error_new(j,kk)=abs(e_new(j,kk))/Bicarbonate_data(j)*100 //in %
            relative_error_old(j,kk)=abs(e_old(j,kk))/Bicarbonate_data(j)*100 //in %
        end
    end
end

```

```

relative_error_corr(j,kk)=abs(e_corr(j,kk))/Bicarbonate_data(j)*100 //in %

sum_relative_errors_new=sum_relative_errors_new+relative_error_new(j,kk) //in %
sum_relative_errors_old=sum_relative_errors_old+relative_error_old(j,kk) //in %
sum_relative_errors_corr=sum_relative_errors_corr+relative_error_corr(j,kk) //in %
end
end
end

MAPE_new_theoretical_Bicarbonate=sum_relative_errors_new/((length(Bicarbonate_data)-1)*length(HAc_data)-1)//We exclude
Bicarbonate_data(1,:) which is equal to 0
MAPE_old_theoretical_Bicarbonate=sum_relative_errors_old/((length(Bicarbonate_data)-1)*length(HAc_data)-1)
MAPE_corr_theoretical_Bicarbonate=sum_relative_errors_corr/((length(Bicarbonate_data)-1)*length(HAc_data)-1)

format(7)
disp('MAPE of [NaHCO3]new vs [NaHCO3]theoretical = '+string(MAPE_new_theoretical_Bicarbonate)+'%')
disp('MAPE of [NaHCO3]old vs [NaHCO3]theoretical = '+string(MAPE_old_theoretical_Bicarbonate)+'%')
disp('MAPE of [NaHCO3]corr vs [NaHCO3]theoretical = '+string(MAPE_corr_theoretical_Bicarbonate)+'%')

// put simulation results in graphics
bisector=[0 0
Bicarbonate_data($) Bicarbonate_data($)]

clf()
subplot(131)
plot(Bicarbonate_data',Bicarbonate_old','*')
plot(bisector(:,1),bisector(:,2),'k--')
replot([0,0,Bicarbonate_data($)*1.05,Bicarbonate_data($)*1.5])
xtitle('Calculated [NaHCO3] versus theoretical [NaHCO3], Nordmann','Theoretical [NaHCO3] (mg/L)','[NaHCO3] calculated
with the empirical formula of Nordmann (mg/L)')
legend('HAc= '+string(HAc_data(1))+ ' mg/L','HAc= '+string(HAc_data(2))+ ' mg/L','HAc= '+string(HAc_data(3))+ ' mg/L','HAc=
'+string(HAc_data(4))+ ' mg/L','HAc= '+string(HAc_data(5))+ ' mg/L','HAc= '+string(HAc_data(6))+ ' mg/L','HAc=
'+string(HAc_data(7))+ ' mg/L','HAc= '+string(HAc_data(8))+ ' mg/L','HAc= '+string(HAc_data(9))+ ' mg/L','HAc=
'+string(HAc_data(10))+ ' mg/L','HAc= '+string(HAc_data(11))+ ' mg/L','HAc= '+string(HAc_data(12))+ ' mg/L',pos=2)

subplot(132)
plot(Bicarbonate_data',Bicarbonate_new','*')
plot(bisector(:,1),bisector(:,2),'k--')
replot([0,0,Bicarbonate_data($)*1.05,Bicarbonate_data($)*1.5])
xtitle('Calculated [NaHCO3] versus theoretical [NaHCO3], new formula','Theoretical [NaHCO3] (mg/L)','[NaHCO3] calculated
with new formula (mg/L)')
legend('HAc= '+string(HAc_data(1))+ ' mg/L','HAc= '+string(HAc_data(2))+ ' mg/L','HAc= '+string(HAc_data(3))+ ' mg/L','HAc=
'+string(HAc_data(4))+ ' mg/L','HAc= '+string(HAc_data(5))+ ' mg/L','HAc= '+string(HAc_data(6))+ ' mg/L','HAc=
'+string(HAc_data(7))+ ' mg/L','HAc= '+string(HAc_data(8))+ ' mg/L','HAc= '+string(HAc_data(9))+ ' mg/L','HAc=
'+string(HAc_data(10))+ ' mg/L','HAc= '+string(HAc_data(11))+ ' mg/L','HAc= '+string(HAc_data(12))+ ' mg/L',pos=2)

subplot(133)
plot(Bicarbonate_data',Bicarbonate_old_to_new','*')
plot(bisector(:,1),bisector(:,2),'k--')
replot([0,0,Bicarbonate_data($)*1.05,Bicarbonate_data($)*1.5])
xtitle('Calculated [NaHCO3] versus theoretical [NaHCO3], correction of Nordmann values by new formula','Theoretical [Na-
HCO3] (mg/L)','Empirical [NaHCO3] corrected by new formula (mg/L)')
legend('HAc= '+string(HAc_data(1))+ ' mg/L','HAc= '+string(HAc_data(2))+ ' mg/L','HAc= '+string(HAc_data(3))+ ' mg/L','HAc=
'+string(HAc_data(4))+ ' mg/L','HAc= '+string(HAc_data(5))+ ' mg/L','HAc= '+string(HAc_data(6))+ ' mg/L','HAc=
'+string(HAc_data(7))+ ' mg/L','HAc= '+string(HAc_data(8))+ ' mg/L','HAc= '+string(HAc_data(9))+ ' mg/L','HAc=
'+string(HAc_data(10))+ ' mg/L','HAc= '+string(HAc_data(11))+ ' mg/L','HAc= '+string(HAc_data(12))+ ' mg/L',pos=2)

```

**Manuscript submitted to Applied Sciences (MDPI)**

`show_window`

*//end of code*

## Scilab code 2 for calculation of the acetic acid contents at different sodium bicarbonate concentrations

```
// titration_FOS_TAC_HAc-simul_vs_HAc-theor.sce
// English version made on 08 november 2021
// Accurate estimation of bicarbonate and acetic acid concentrations with wider ranges in anaerobic media using classical FOS/TAC titration
method // Authors : X. Liu, M. Mercier-Huat, L. André, A. Pauss and T. Ribeiro // Université de Technologie de Compiègne (France) and Insti-
tut Polytechnique UniLaSalle (France)
// Simulation of HAc contents by Nordmann's empirical formulas (FOS / TAC) and our newly proposed formulas for different theoretical HAc
contents et different NaHCO3 levels
// This work is licensed under a Creative Commons Attribution-NonCommercial 4.0 International License (CC BY-NC 4.0).

//      ! IMPORTANT !
// To run the code, you must install fmincon from the Scilab command line (and restart Scilab): atomsInstall fmincon

// All mass concentrations are expressed in mg/L

clear
funcprot(0)
clc

function [HAc, Ac, CO2, HCO3, CO3, zp]=HAc_bicarbonate(h)
    HAc=conc_HAc.*h./(h+Ka_HAc)
    Ac=conc_HAc*Ka_HAc./(h+Ka_HAc)
    deno_Ci=(h.*h)+(h.*Ka1_Ci)+(Ka1_Ci*Ka2_Ci)
    CO2=conc_Ci.*h.*h./deno_Ci
    HCO3=conc_Ci*Ka1_Ci.*h./deno_Ci
    CO3=conc_Ci*Ka1_Ci*Ka2_Ci./deno_Ci
    zp=(h+conc_Na)-((1e-14./h)+Ac+HCO3+2.*CO3+2*conc_H2SO4)
endfunction

HAc_data=[0 50 100 500 1000 3000 5000 7000 10000 15000 20000 40000] //mg/L
Bicarbonate_data=[0 50 100 500 1000 3000 5000 7000 10000 15000 20000 40000] //mg/L
N_data=length(HAc_data)
Ka1_Ci=10^(-6.35);Ka2_Ci=10^(-10.35)
Ka_HAc=10^(-4.76)
pH_init=8

// Conditions of titration
txt=['Sample volume (mL)';'Water volume for dilution (mL)';'Concentration of the titrant - H2SO4 (mol/L)';'First pH equivalence
point (-)';'Second pH equivalence point (-)';'Number of steps of titration (min 5000)'];
sig=x_mdialog('Enter the values, or accept the default values (!! use the point as decimal separa-
tor !!)',txt,['5';'15';'0.05';'5';'4.4';'7000'])
volume_sample=evstr(sig(1))
volume_water_dilution=evstr(sig(2))
conc_init_H2SO4=evstr(sig(3))
high_endpoint=evstr(sig(4))
low_endpoint=evstr(sig(5))
N=evstr(sig(6))

for kk=1:length(Bicarbonate_data)
    for j=1:N_data
        conc_mass_init_Ci=Bicarbonate_data(kk) // mg/L
        conc_mass_init_HAc=HAc_data(j) //mg/L

        // convert mg/L to mol/L
        conc_init_Ci=conc_mass_init_Ci/84/1000 // mol/L
        conc_init_HAc=conc_mass_init_HAc/60/1000 // mol/L
        conc_init_Na=conc_init_Ci+conc_init_HAc
```



```

Veq = (conc_init_Ci+conc_init_HAc)*volume_sample/2/conc_init_H2SO4
if HAc_data(j)<=50;Veq=Veq*2;end // extention of titration in the absence of bicarbonate
if Veq==0 // avoid Veq=0 for [HAc]=0 and [Bicarbonate]=0
    Veq=10^(-3)*volume_sample/2/conc_init_H2SO4 // titration until pH=3
end

/// calculation of concentration with dilution factors
volume_H2SO4=linspace(0,Veq,N)
dilution_factor=volume_sample./(volume_sample+volume_H2SO4+volume_water_dilution)
conc_Ci=conc_init_Ci.*dilution_factor
conc_HAc=conc_init_HAc.*dilution_factor
conc_Na=conc_init_Na.*dilution_factor
conc_H2SO4=conc_init_H2SO4.*volume_H2SO4./(volume_sample+volume_H2SO4+volume_water_dilution)

/// calculation of pH during the titration by a dichotomous method
pH=pH_init*ones(1,N)
for z=1:20
    [HAc,Ac,CO2,HCO3,CO3,zp]=HAc_bicarbonate(10^(-pH))
    pH=pH+sign(zp)*14*0.5^z
end

// identification of the equivalent volumes corresponding to the 2 reference pH points of the titration
for ii=1:N
    while pH(ii)>high_endpoint
        ii=ii+1
    end
    Veq1=(volume_H2SO4(ii)+volume_H2SO4(ii-1))/2
    pH_Veq1=(pH(ii)+pH(ii-1))/2
    while pH(ii)>low_endpoint
        ii=ii+1
    end
    Veq2=(volume_H2SO4(ii)+volume_H2SO4(ii-1))/2
    pH_Veq2=(pH(ii)+pH(ii-1))/2
    break
end

// Calculation of [HAc] et [bicarbonate] for HACH titrateur using Nordmann method (note that the sample volume must be 5 mL)
TAC_old(j,kk)=Veq1*50045*2*conc_init_H2SO4/volume_sample
HAc_old(j,kk)=(((Veq2-Veq1)*4*1.66)-0.15)*500 // 1.66 et 0.15 are purely empirical factors given by McGhee (1968)
Veq1_titration(j,kk)=Veq1 // to export the results
DeltaV_titration(j,kk)=Veq2-Veq1
end
end

// identification of model parameters
function y=f(x, V)
    y=x(1)*V(1)+x(2)*V(2)+x(3) // // Model: [HAc]new = HAc_new_a * Veq1 + HAc_new_b * (Veq2-Veq1) + HAc_new_c in mg/L
endfunction

function SSE=regres_f(x, V, y_theo)
    e=f(x,V)-y_theo
    SSE=sum(e.^2)
endfunction

opt = optimoptions("fmincon"); // fmincon optimization method
V=list(Veq1_titration,DeltaV_titration)
HAc_theo=zeros(length(HAc_data),length(Bicarbonate_data))

```

## Manuscript submitted to Applied Sciences (MDPI)

```
for i=1:length(HAc_data)
    HAc_theo(i,:)=HAc_data(i)
end

HAc_new_a0=0 // initial values for regression
HAc_new_b0=1000
HAc_new_c0=0
x0_f=[HAc_new_a0 HAc_new_b0 HAc_new_c0]

problem_f = struct();
problem_f.objective = list(regres_f,V,HAc_theo);
problem_f.x0 = x0_f;
problem_f.options = opt;
thetaopt_f = fmincon(problem_f);
HAc_new_a=thetaopt_f(1)
HAc_new_b=thetaopt_f(2)
HAc_new_c=thetaopt_f(3)
SSE=regres_f(thetaopt_f,V,HAc_theo)
e_tot=HAc_theo-mean(HAc_theo)
SST=sum(e_tot.^2)
R2=1-SSE/SST

// show modeling results
format(6)
disp('pH1 = '+string(high_endpoint)+' pH2 = '+string(low_endpoint))
disp('HAc_new_a = '+string(thetaopt_f(1))+' HAc_new_b = '+string(thetaopt_f(2))+' HAc_new_c = '+string(thetaopt_f(3)))
disp('[HAc] = '+string(thetaopt_f(1))+' * A + '+string(thetaopt_f(2))+' * B '+string(thetaopt_f(3))+' ([HAc] in mg/L)')
disp('with A = Veq1 and B = Veq2 - Veq1 (A and B in mL)')
disp('R2 = '+string(R2))

HAc_old_to_new_a=HAc_new_a./1000.9
HAc_old_to_new_b=HAc_new_b./3320
HAc_old_to_new_c=75*HAc_new_b./3320+HAc_new_c
disp('FOS old to new = '+string(HAc_old_to_new_a)+' * TAC old '+string(HAc_old_to_new_b)+' * FOS old +
'+string(HAc_old_to_new_c)+' ([HAc] in mg/L)')

// Calculate relative errors and Mean Absolute Percentage Error (MAPE)
sum_relative_errors_new=0 // initial values to calculate the relative errors
sum_relative_errors_old=0
sum_relative_errors_corr=0

relative_errors_new(1,:)=0 // We do not calculate the relative errors for [bicarbonate] = 0
relative_errors_old(1,:)=0
relative_errors_corr(1,:)=0

for kk=1:length(Bicarbonate_data)
    for j=1:N_data
        HAc_new(j,kk)=Veq1_titration(j,kk)*HAc_new_a+DeltaV_titration(j,kk)*HAc_new_b+HAc_new_c
        HAc_old_to_new(j,kk)=(TAC_old(j,kk)*HAc_old_to_new_a)+(HAc_old(j,kk)*HAc_old_to_new_b)+HAc_old_to_new_c

        e_new(j,kk)=HAc_new(j,kk)-HAc_data(j)
        e_old(j,kk)=HAc_old(j,kk)-HAc_data(j)
        e_corr(j,kk)=HAc_old_to_new(j,kk)-HAc_data(j)

        if HAc_data(j)>0
            relative_errors_new(j,kk)=abs(e_new(j,kk))/HAc_data(j)*100 //in %
            relative_errors_old(j,kk)=abs(e_old(j,kk))/HAc_data(j)*100 //in %
            relative_errors_corr(j,kk)=abs(e_corr(j,kk))/HAc_data(j)*100 //in %
```

```

sum_relative_errors_new=sum_relative_errors_new+relative_errors_new(j,kk) //in %
sum_relative_errors_old=sum_relative_errors_old+relative_errors_old(j,kk) //in %
sum_relative_errors_corr=sum_relative_errors_corr+relative_errors_corr(j,kk) //in %
end
end
end

MAPE_HAc_new_theoretical=sum_relative_errors_new/(length(Bicarbonate_data)*length(HAc_data)-1) //We exclude
HAc_data(1,:) which is equal to 0
MAPE_HAc_old_theoretical=sum_relative_errors_old/(length(Bicarbonate_data)*(length(HAc_data)-1)-1)
MAPE_HAc_corr_theoretical=sum_relative_errors_corr/(length(Bicarbonate_data)*(length(HAc_data)-1)-1)

format(6)
disp('MAPE of [HAc]new vs [HAc]theoretical = '+string(MAPE_HAc_new_theoretical)+'%')
disp('MAPE of [HAc]old vs [HAc]theoretical = '+string(MAPE_HAc_old_theoretical)+'%')
disp('MAPE of [HAc]corr vs [HAc]theoretical = '+string(MAPE_HAc_corr_theoretical)+'%')

// put simulation results in graphics
bisector=[0 0
HAc_data($) HAc_data($)]

clf()
subplot(131)
plot(HAc_data',HAc_old, '*')
plot(bisector(:,1),bisector(:,2), 'k--')
replot([0,0,HAc_data($)*1.05,HAc_data($)*1.05])
xtitle('Calculated [HAc] versus theoretical [HAc], Nordmann','Theoretical [HAc] (mg/L)', '[HAc] calculated with the empirical
formula of Nordmann (mg/L)')
legend(['[NaHCO3]= '+string(Bicarbonate_data(1))+ ' mg/L', '[NaHCO3]= '+string(Bicarbonate_data(2))+ ' mg/L', '[NaHCO3]=
'+string(Bicarbonate_data(3))+ ' mg/L', '[NaHCO3]= '+string(Bicarbonate_data(4))+ ' mg/L', '[NaHCO3]= '+string(Bicar-
bonate_data(5))+ ' mg/L', '[NaHCO3]= '+string(Bicarbonate_data(6))+ ' mg/L', '[NaHCO3]= '+string(Bicarbonate_data(7))+ ' mg/L', '[Na-
HCO3]= '+string(Bicarbonate_data(8))+ ' mg/L', '[NaHCO3]= '+string(Bicarbonate_data(9))+ ' mg/L', '[NaHCO3]= '+string(Bicar-
bonate_data(10))+ ' mg/L', '[NaHCO3]= '+string(Bicarbonate_data(11))+ ' mg/L', '[NaHCO3]= '+string(Bicarbonate_data(12))+ '
mg/L', pos=2)

subplot(132)
plot(HAc_data',HAc_new, '*')
plot(bisector(:,1),bisector(:,2), 'k--')
replot([0,0,HAc_data($)*1.05,HAc_data($)*1.05])
xtitle('Calculated [HAc] versus theoretical [HAc], new formula','Theoretical [HAc] (mg/L)', '[HAc] calculated with new formula
(mg/L)')
legend(['[NaHCO3]= '+string(Bicarbonate_data(1))+ ' mg/L', '[NaHCO3]= '+string(Bicarbonate_data(2))+ ' mg/L', '[NaHCO3]=
'+string(Bicarbonate_data(3))+ ' mg/L', '[NaHCO3]= '+string(Bicarbonate_data(4))+ ' mg/L', '[NaHCO3]= '+string(Bicar-
bonate_data(5))+ ' mg/L', '[NaHCO3]= '+string(Bicarbonate_data(6))+ ' mg/L', '[NaHCO3]= '+string(Bicarbonate_data(7))+ ' mg/L', '[Na-
HCO3]= '+string(Bicarbonate_data(8))+ ' mg/L', '[NaHCO3]= '+string(Bicarbonate_data(9))+ ' mg/L', '[NaHCO3]= '+string(Bicar-
bonate_data(10))+ ' mg/L', '[NaHCO3]= '+string(Bicarbonate_data(11))+ ' mg/L', '[NaHCO3]= '+string(Bicarbonate_data(12))+ '
mg/L', pos=2)

subplot(133)
plot(HAc_data',HAc_old_to_new, '*')
plot(bisector(:,1),bisector(:,2), 'k--')
replot([0,0,HAc_data($)*1.05,HAc_data($)*1.05])
xtitle('Calculated [HAc] versus theoretical HAc, correction of Nordmann values by new formula','Theoretical [HAc] (mg/L)', 'Em-
pirical [HAc] corrected by new formula (mg/L)')
legend(['[NaHCO3]= '+string(Bicarbonate_data(1))+ ' mg/L', '[NaHCO3]= '+string(Bicarbonate_data(2))+ ' mg/L', '[NaHCO3]=
'+string(Bicarbonate_data(3))+ ' mg/L', '[NaHCO3]= '+string(Bicarbonate_data(4))+ ' mg/L', '[NaHCO3]= '+string(Bicar-
bonate_data(5))+ ' mg/L', '[NaHCO3]= '+string(Bicarbonate_data(6))+ ' mg/L', '[NaHCO3]= '+string(Bicarbonate_data(7))+ ' mg/L', '[Na-
```

## Manuscript submitted to Applied Sciences (MDPI)

```
HCO3]= '+string(Bicarbonate_data(8))+ ' mg/L','[NaHCO3]= '+string(Bicarbonate_data(9))+ ' mg/L','[NaHCO3]= '+string(Bicarbonate_data(10))+ ' mg/L','[NaHCO3]= '+string(Bicarbonate_data(11))+ ' mg/L','[NaHCO3]= '+string(Bicarbonate_data(12))+ ' mg/L',pos=2)
```

```
show_window
```

```
//end of code
```
